# Supplementary material for: PHI-1, an Endogenous Inhibitor Protein for Protein Phosphatase-1 and a Pan-Cancer Marker, Regulates Raf-1 Proteostasis
Source: MDPI journal article supplement (doi:10.3390/biom13121741), 2023-12-04
Supplement: s1 [file s1]

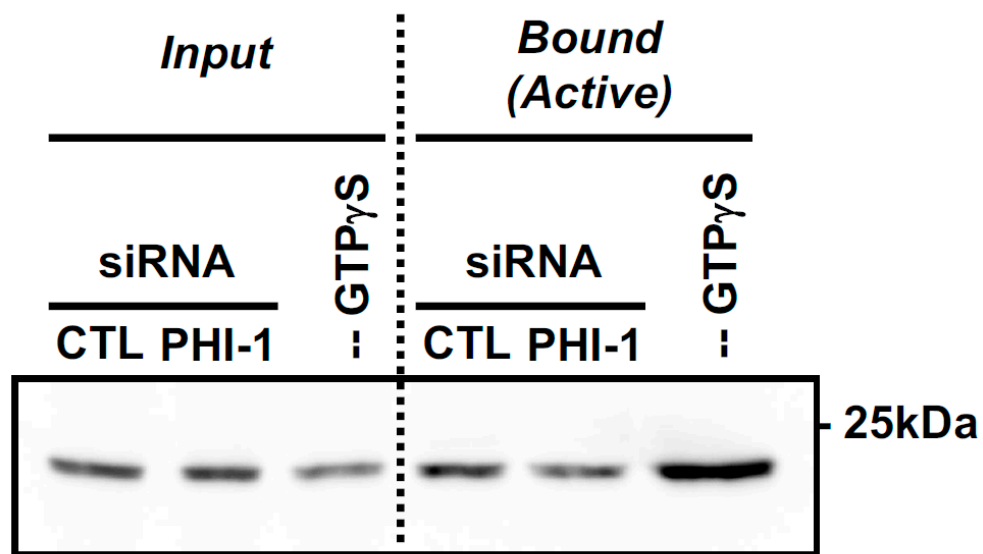

### ***Anti-Ras blot***

**Supplemental Figure S1:** Ras-GTP-pulldown assay. HEK293 cells were treated with siRNA for PHI-1 or control (CTL), and then subjected to Ras-binding domain pulldown assay, as described in Stevenson et al., FEBS Lett 578 (2004) 73-79. GTP $\gamma$ S was used for the positive control.
