# Supplementary figures and images for: PHI-1, an Endogenous Inhibitor Protein for Protein Phosphatase-1 and a Pan-Cancer Marker, Regulates Raf-1 Proteostasis
Source: MDPI journal article supplement (doi:10.3390/biom13121741), 2023-12-04

Uncropped images

Figure 1B

Anti-PHI-1

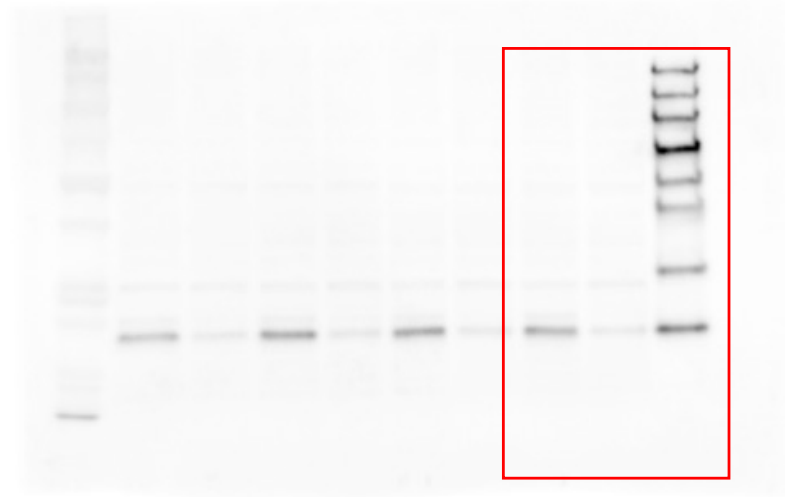

Anti-actin

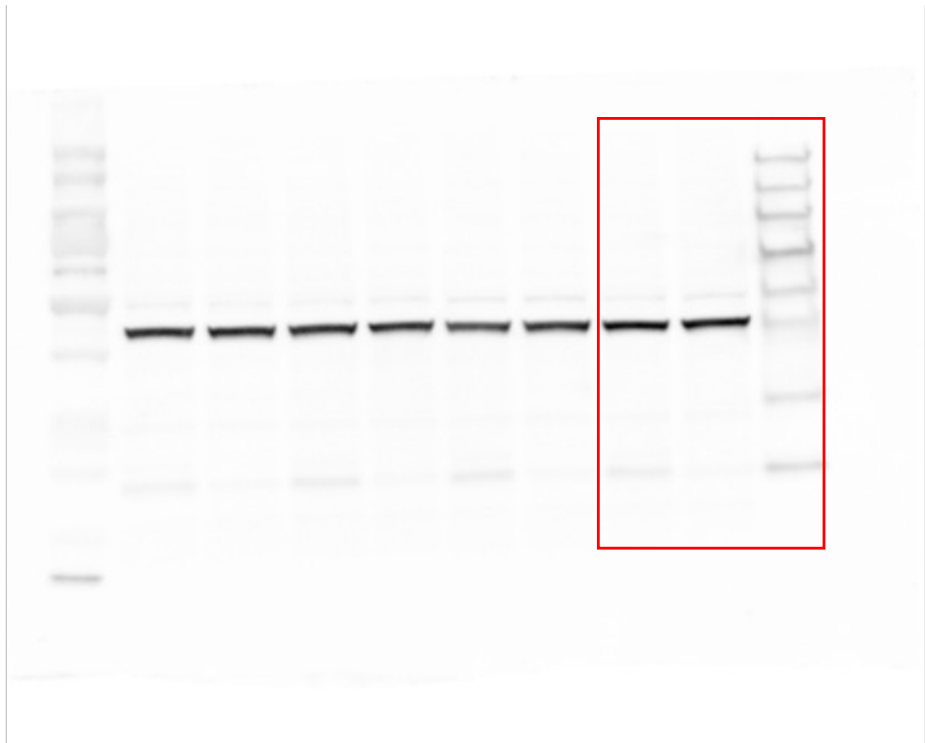

Supplement: s1 [file s1]

Uncropped blot images

Figure 2

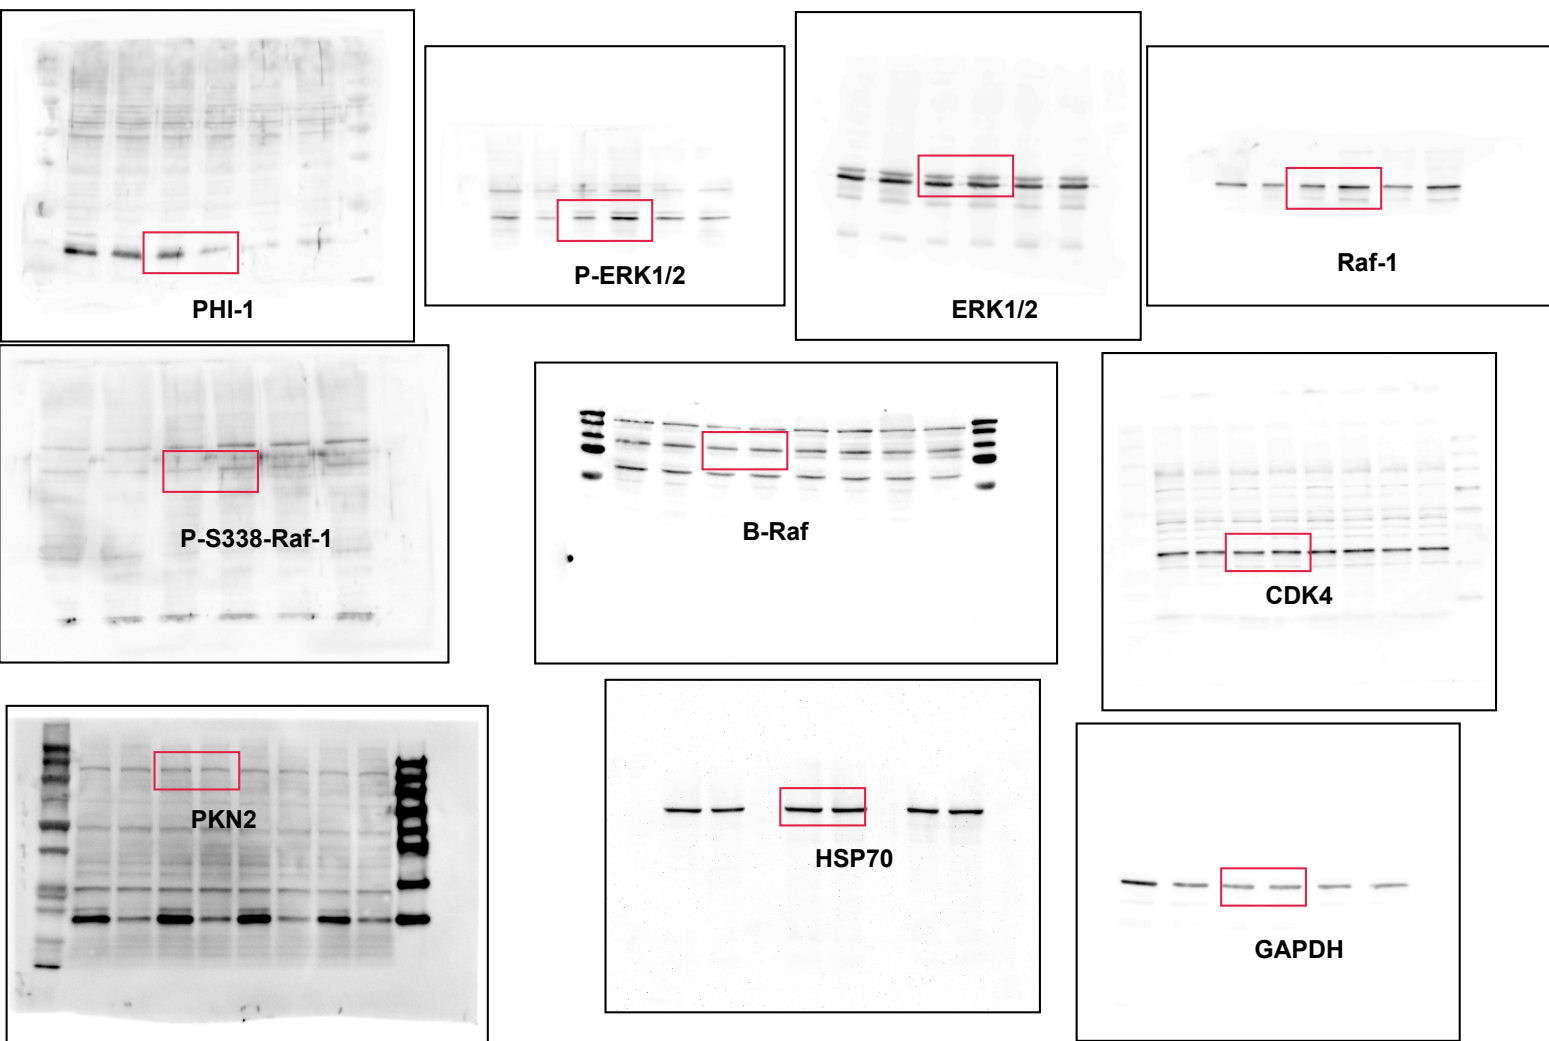

Figure 3A

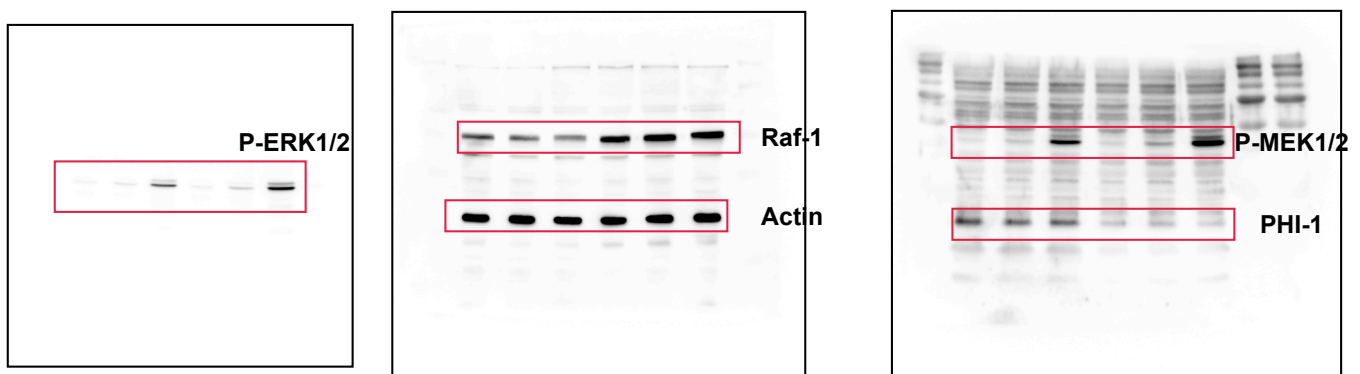

Figure 3C

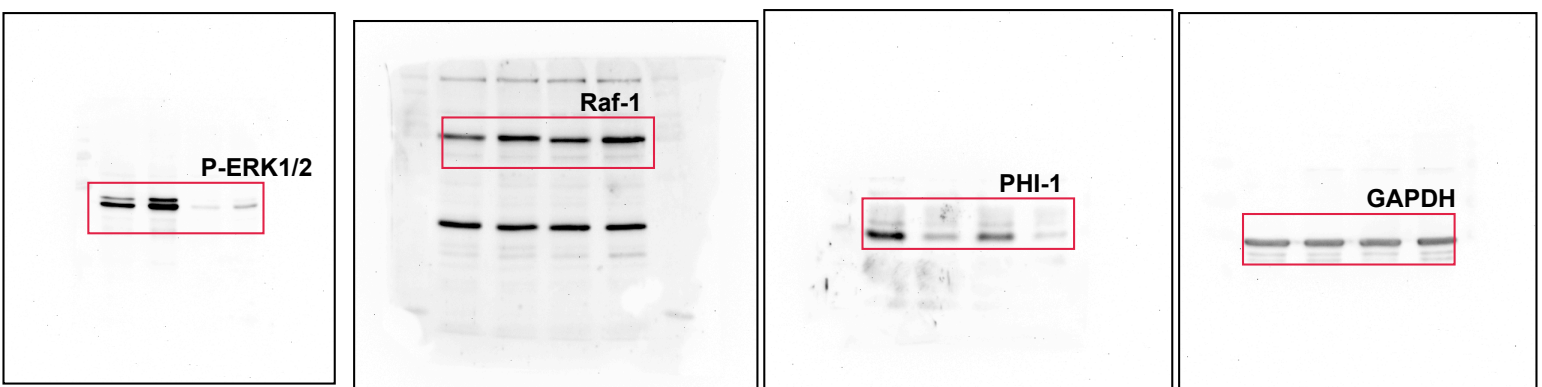

Figure 4A

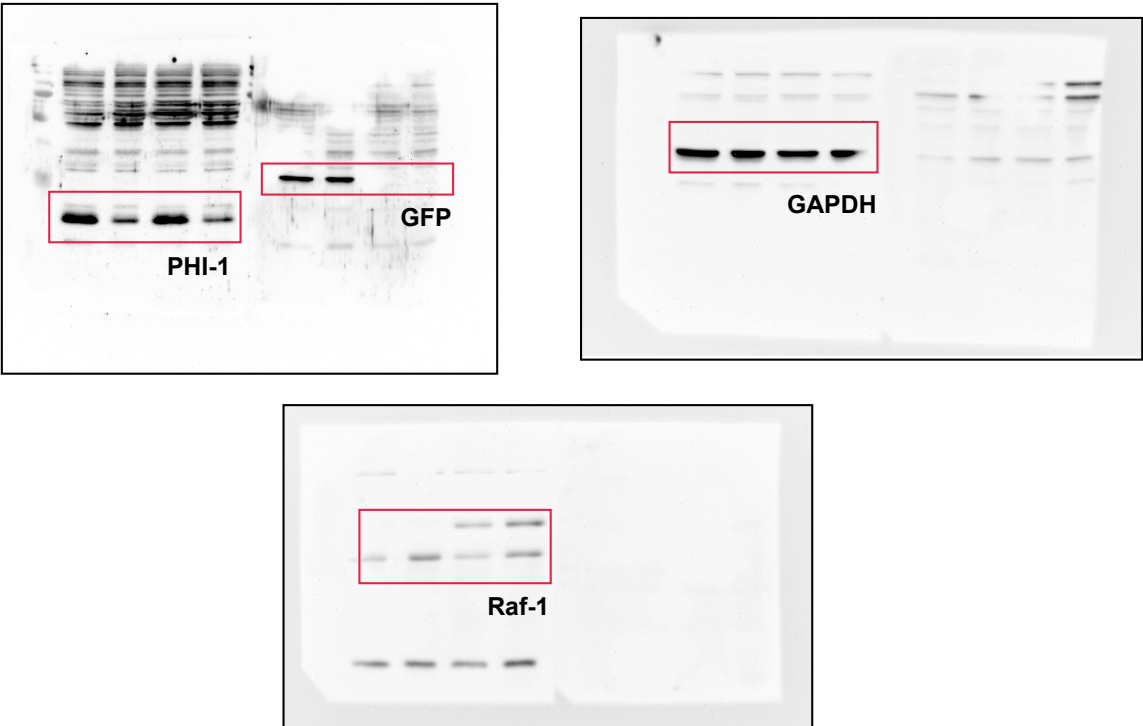

Figure 4B

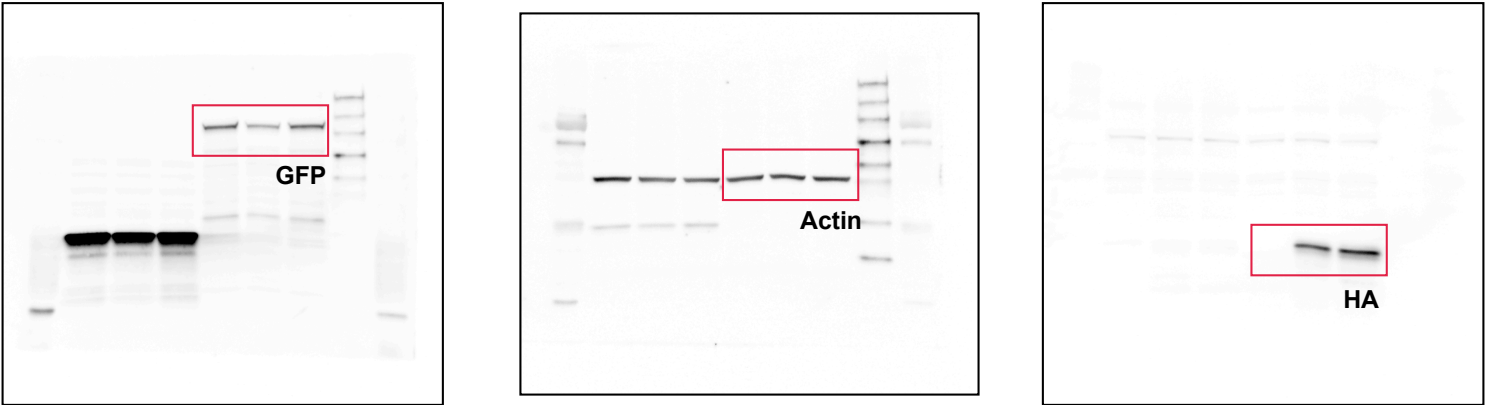

Figure 5

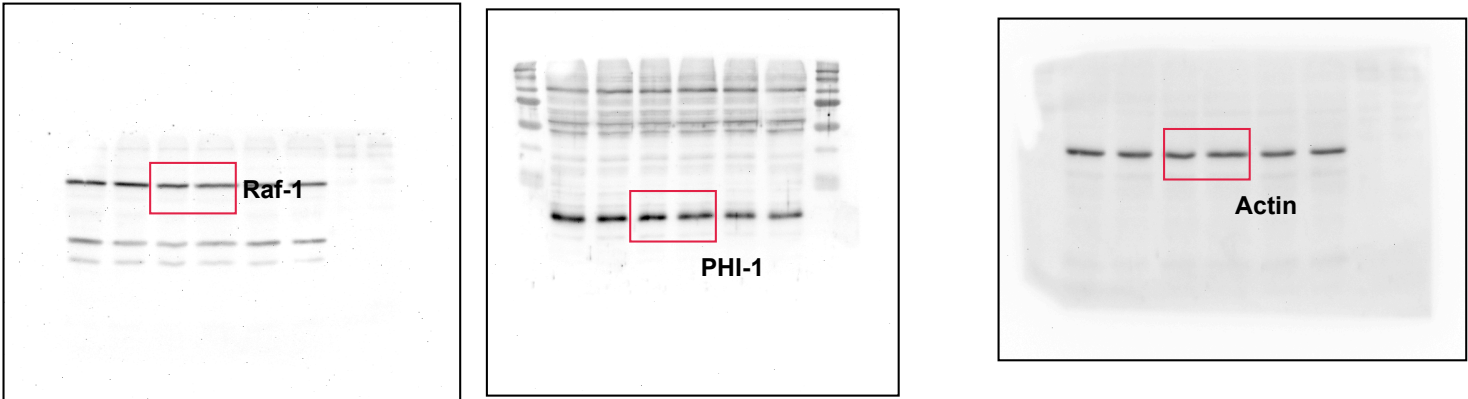

Supplement: s1 [file s1]
